# Supplementary material for: Trends in and Predictors of Long-Term Antipsychotic Polypharmacy Use Among Ohio Medicaid Patients with Schizophrenia, 2008–2014
Source: Atypon-hosted journal article supplement (doi:10.1176/appi.ps.201800052), 2018-07-02
Supplement: appi.ps.201800052.ds001.pdf [file appi.ps.201800052.ds001.pdf]

Supplemental Table 1. Demographic and Clinical Characteristics of Ohio Medicaid Patients with Schizophrenia, 2008 and 2014

| Characteristics                         | 2008        | 2014         | Linear trend<br><i>p</i> -value† |
|-----------------------------------------|-------------|--------------|----------------------------------|
| Age, mean (SD)                          | 45.2 (11.7) | 45.5 (12.3)  | < 0.001                          |
| Race‡                                   |             |              |                                  |
| White                                   | 5937 (64.5) | 6746 (58.7)  | 0.132                            |
| Black                                   | 3179 (34.5) | 4481 (39.0)  | 0.411                            |
| Other                                   | 95 (1.0)    | 273 (2.4)    | < 0.001                          |
| Gender                                  |             |              |                                  |
| Female                                  | 4840 (52.6) | 5513 (47.9)  | < 0.001                          |
| Male                                    | 4371 (47.4) | 5987 (52.1)  |                                  |
| Disabled                                |             |              |                                  |
| No                                      | 426 (4.6)   | 1208 (10.5)  | < 0.001                          |
| Yes                                     | 8785 (95.4) | 10292 (89.5) |                                  |
| Primary schizophrenia diagnosis         |             |              |                                  |
| Schizophrenia                           | 5509 (59.8) | 6510 (56.6)  | 0.008                            |
| Schizoaffective                         | 3702 (40.2) | 4990 (43.4)  |                                  |
| Any psychiatric comorbidity             |             |              |                                  |
| No                                      | 3976 (43.2) | 3935 (34.2)  | < 0.001                          |
| Yes                                     | 5235 (56.8) | 7565 (65.8)  |                                  |
| Any substance abuse                     |             |              |                                  |
| No                                      | 6594 (71.6) | 6417 (55.8)  | < 0.001                          |
| Yes                                     | 2617 (28.4) | 5083 (44.2)  |                                  |
| Location                                |             |              |                                  |
| Urban                                   | 1564 (18.7) | 1886 (16.4)  | < 0.001                          |
| Rural                                   | 6776 (81.3) | 9614 (83.6)  |                                  |
| Classes, mean (SD)                      | 2.6 (1.1)   | 2.6 (1.1)    | < 0.001                          |
| Number of out-patient visits, mean (SD) | 19.1 (33.3) | 27.8 (39.1)  | < 0.001                          |
| Number of in-patient visits, mean (SD)  | 0.2 (0.6)   | 0.3 (0.8)    | 0.861                            |
| Number of ED visits, mean (SD)          | 0.3 (1.2)   | 0.4 (1.1)    | < 0.001                          |
| Charlson comorbidity score, mean (SD)   | 0.9 (1.5)   | 1.1 (1.7)    | < 0.001                          |

†Linear trend *p*-values are based on a generalized estimating equation (GEE) population averaged regression model, either linear or logistic regression, using all years of data (2008 to 2014). Each subject could have multiple observations – one for each year or fewer.

‡The trend for each race is relative to all other races. For example the White subjects are compared to all other non-White subjects
